# Supplementary material for: Engineered zinc finger nickases induce homology-directed repair with reduced mutagenic effects
Source: PubMed Central journal article supplement — Nucleic Acids Res. 2012 Feb 28;40(12):5560–8. doi: 10.1093/nar/gks179 (PMC3384306; doi:10.1093/nar/gks179), 2012-02-28

## SUPPLEMENTARY DATA

“Engineered Zinc Finger Nickases Induce Homology-Directed Repair with Reduced Mutagenic Effects”  
Ramirez & Certo et al.

Supplementary Tables 1-3 and Supplementary Figure 1.

Supplementary Table 1: Sequences of oligonucleotides used in this study.

| Name    | 5' to 3' Sequence                          |
|---------|--------------------------------------------|
| OC152   | ATCTGTCATCCTCATCCTGATAAACTGCAAAG           |
| OC153   | TAATCTTTTGCAGTTTATCAGGATGAGGATGAC          |
| OC213   | GACGCCCGCCATAAACTG                         |
| OC215   | GCACGTTCTTATATGTAGCTTTTCG                  |
| OC417   | CGGTGTGAAATACCGCACAG                       |
| OC418   | CAGCAGCAGCAGACCATTTTC                      |
| OC665   | GATCGAGCAGCGTCTTCGAGAGTGAGGAC              |
| OC666   | CTAGGTCCTCACTCTCGAAGACGCTGCTC              |
| OC667   | GATCCAGCGTCTTCGAGAGTGAGGACGTGT             |
| OC668   | CTAGACACGTCCTCACTCTCGAAGACGCTG             |
| OC671   | GATCGAGACTCCCACGGCCGGGAAGAGT               |
| OC672   | CTAGACTCTTCCCCGGCCGTGGGAGTCTC              |
| ams1228 | GGTCGAGCAGCGTCTTCGAGAGTGAGGACGTGTA         |
| ams1229 | CTAGTACACGTCCTCACTCTCGAAGACGCTGCTCGACCTGCA |
| ams1230 | GGGGTCATCCTCATCCTGATAAACTGCAAAGGA          |
| ams1231 | CTAGTCCTTTTGCAGTTTATCAGGATGAGGATGACCCCTGCA |

Supplementary Table 2: ZFN/ZFNickase target sites.

| Target site | Full site                                                          | LEFT half-site<br>(5' to 3') | RIGHT half-site<br>(5' to 3') |
|-------------|--------------------------------------------------------------------|------------------------------|-------------------------------|
| CCR5        | gGTCATCCTCATCctgatAAACTGCAAAGg<br>cCAGTAGGAGTAGgactaTTTGACGTTTTTCc | gGATGAGGATGACc               | tAAACTGCAAAGg                 |
| HX735       | gAGACTCCCAcggccGGGAAGAGt<br>cTCTGAGGGTgcccggCCCCCTCTCa             | gTGGGAGTCTc                  | cGGGAAGAGt                    |
| VF2468      | gAGCAGCGTcttcgaGAGTGAGGAc<br>cTCGTCGAGAagctCTCACTCTg               | aGACGCTGCTc                  | aGAGTGAGGAc                   |
| VF2471      | cAGCGTCTTCgagagtGAGGACGTGt<br>gTCGAGAAGctctcaCTCTGCACa             | cGAAGACGCTg                  | tGAGGACGTGt                   |

Supplementary Table 3: Numerical data used to create Figure 4c-h.

| <b>VF2468</b>         |                    |                        |                            |
|-----------------------|--------------------|------------------------|----------------------------|
| <b>FokI Catalysis</b> | <b>Avg HDR (%)</b> | <b>Avg mutNHEJ (%)</b> | <b>Ratio (HDR:mutNHEJ)</b> |
| +/+                   | 1.279              | 3.620                  | 0.353                      |
| -/+                   | 0.112              | 0.087                  | 1.289                      |
| +/-                   | 0.142              | 0.036                  | 3.913                      |
| -/-                   | 0.000              | 0.017                  | 0.000                      |

  

| <b>VF2471</b>         |                    |                        |                            |
|-----------------------|--------------------|------------------------|----------------------------|
| <b>FokI Catalysis</b> | <b>Avg HDR (%)</b> | <b>Avg mutNHEJ (%)</b> | <b>Ratio (HDR:mutNHEJ)</b> |
| +/+                   | 1.280              | 6.684                  | 0.192                      |
| -/+                   | 0.019              | 0.035                  | 0.544                      |
| +/-                   | 0.005              | 0.040                  | 0.117                      |
| -/-                   | 0.002              | 0.024                  | 0.080                      |

  

| <b>CCR5</b>           |                    |                        |                            |
|-----------------------|--------------------|------------------------|----------------------------|
| <b>FokI Catalysis</b> | <b>Avg HDR (%)</b> | <b>Avg mutNHEJ (%)</b> | <b>Ratio (HDR:mutNHEJ)</b> |
| +/+                   | 2.696              | 8.660                  | 0.311                      |
| -/+                   | 0.641              | 0.174                  | 3.694                      |
| +/-                   | 0.963              | 1.572                  | 0.612                      |
| -/-                   | 0.000              | 0.019                  | 0.015                      |

Supplementary Figure 1: Effect of donor template concentration on ZFNickases (illustrated with the CCR5 site) as assessed by gating on different mean fluorescence intensities (MFI) of the BFP-linked donor template. **(a)** Cell populations were gated to analyze cells with low, medium, and high BFP MFIs for each combination of active and/or inactive CCR5 monomers. A set of representative plots is shown. **(b)** As indicators of mutagenic NHEJ and HDR rates, respectively, the percent of mCherry positive (y-axis) and EGFP-positive (x-axis) cells are noted for each cell population analyzed in **(a)**. **(c)** Bar graphs show mean percentages of EGFP-positive and mCherry-positive cells, with results derived from 3 independent experiments. Error bars indicate SEM. **(d)** Ratios of percentage of EGFP-positive cells to percentage of mCherry-positive cells for the CCR5 ZFNs and ZFNickases using the data from **(c)**.

a.

CCR5 FokI Catalysis

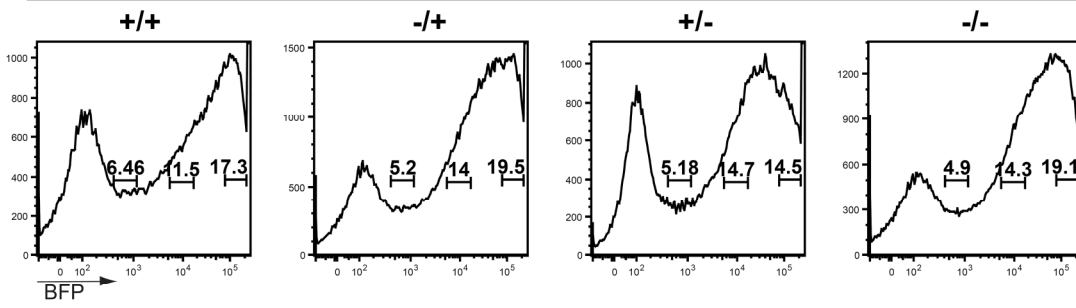

b.

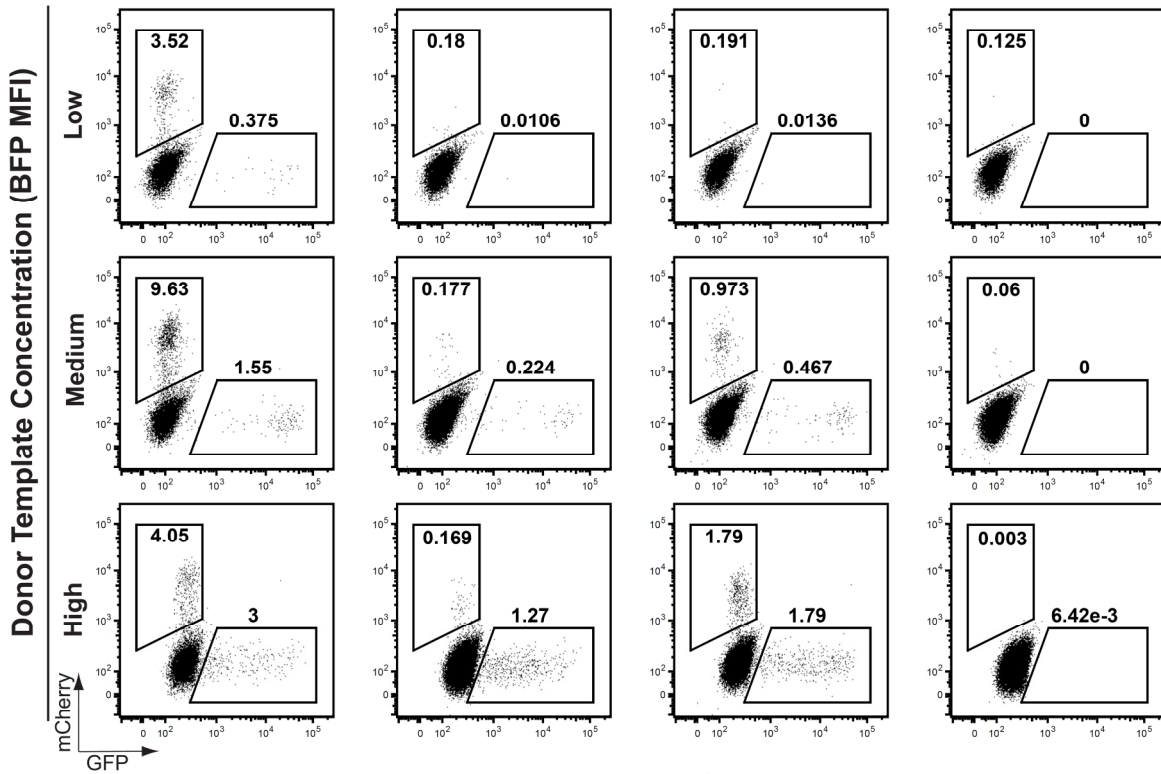

c.

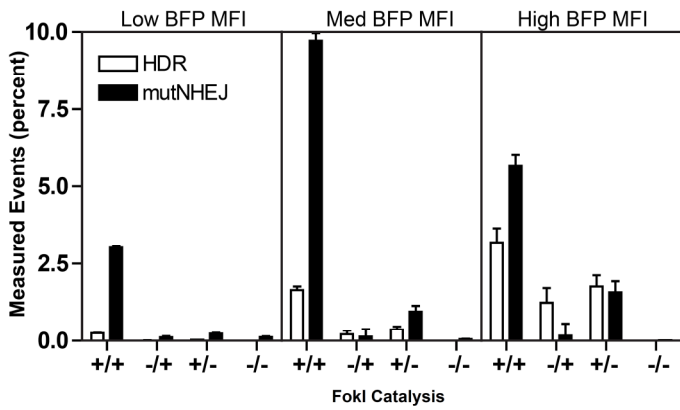

d.

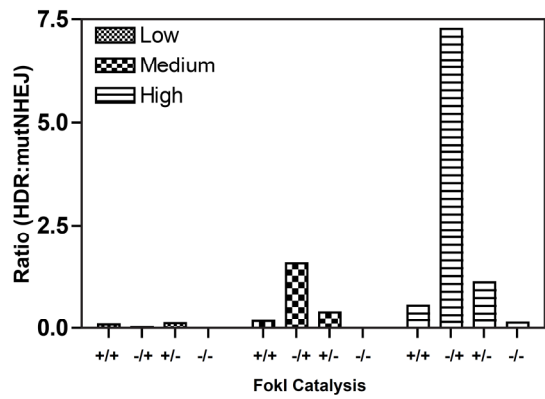

Supplement: supp_gks179_nar-00015-f-2012-File004.pdf [file supp_gks179_nar-00015-f-2012-File004.pdf]
